# Supplementary material
Source: Springer Nature journal article supplement (https://www.springermedizin.de/resource/supplementary/12879_2011_1734_MOESM6_ESM.pdf/9443904)

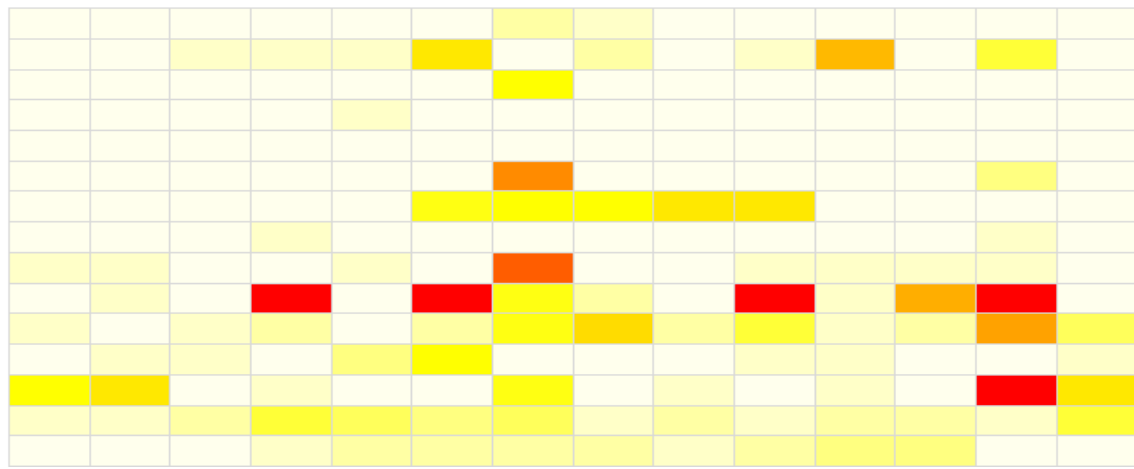

Belarus

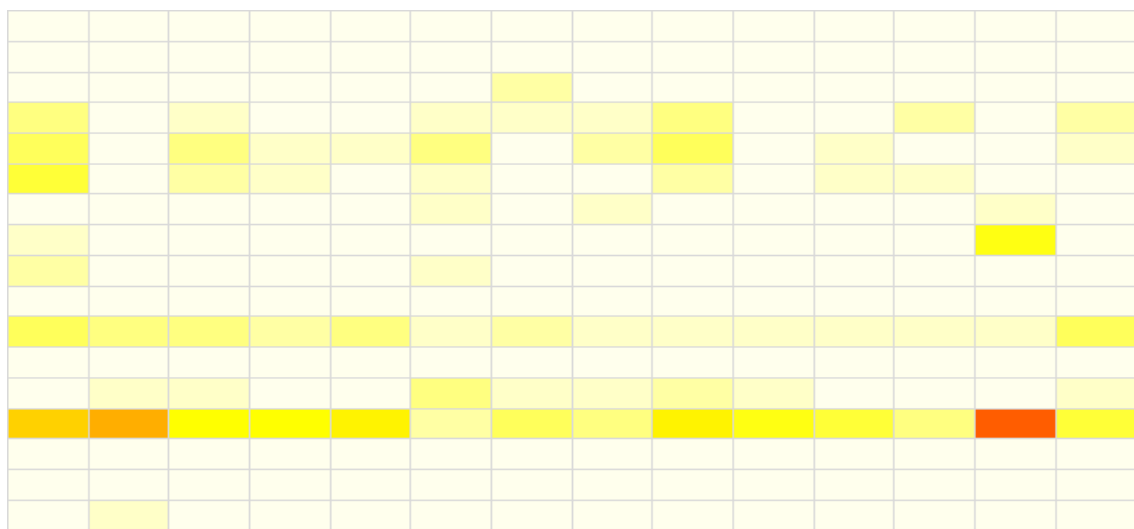

Sweden

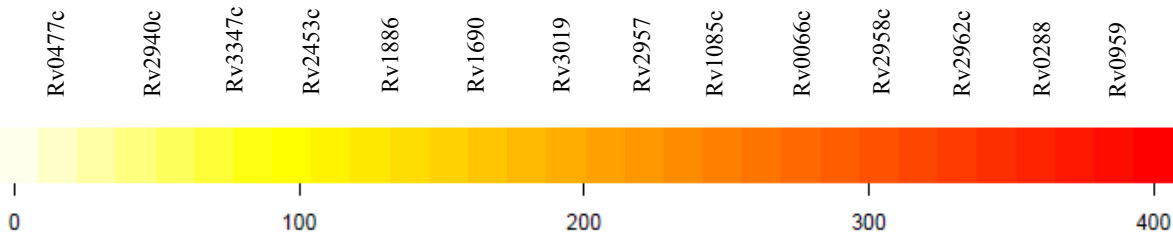

pg/ml IFN- $\gamma$

Supplement: MOESM6 [file 9443904]
